# Supplementary material for: High-intensity interval training combined with cannabidiol supplementation improves cognitive impairment by regulating the expression of apolipoprotein E, presenilin-1, and glutamate proteins in a rat model of amyloid β-induced Alzheimer’s disease
Source: PubMed Central journal article supplement (PMC11556759; doi:10.22038/ijbms.2024.79464.17210), 2024
Supplement: IJBMS-27-1583.S001.pdf [file IJBMS-27-1583.S001.pdf]

A)

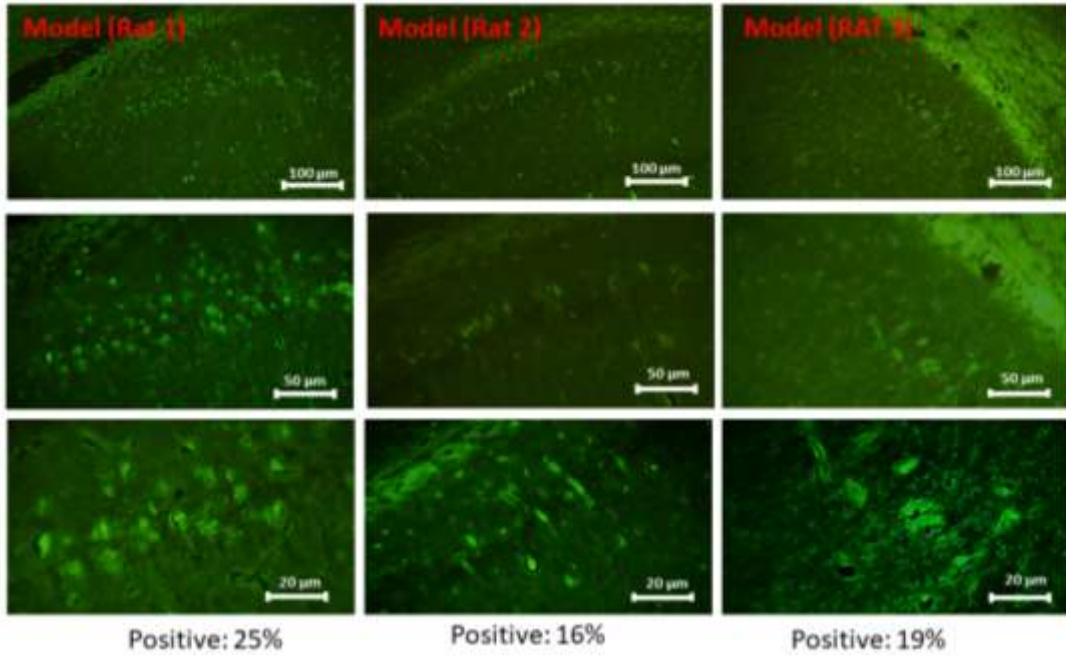

B)

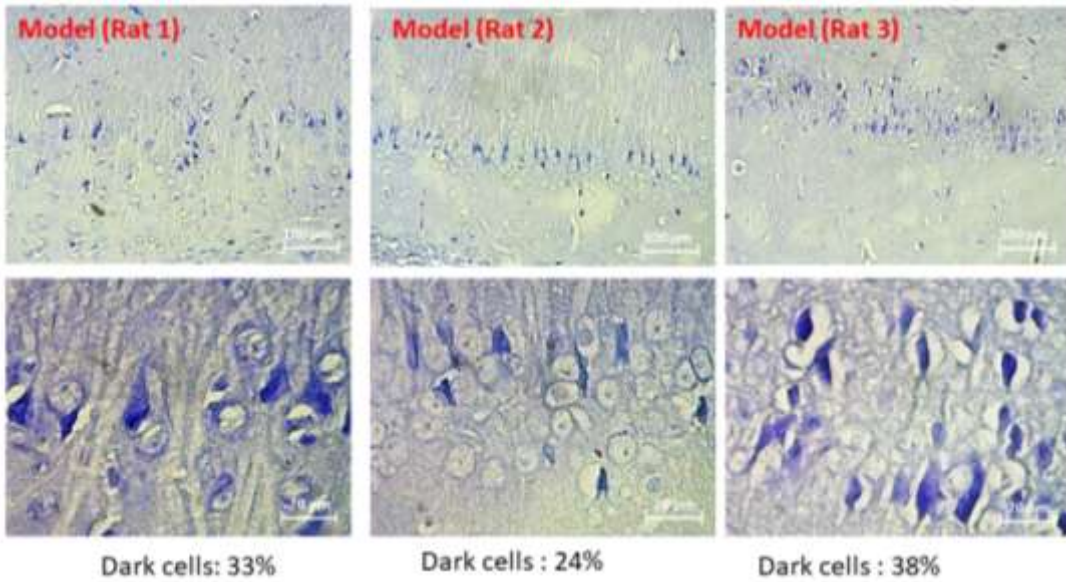

Figure S1. Thioflavin-S and cresyl violet staining in the model group. In order to confirm that Alzheimer's (AD) was induced, three rats were sacrificed ten days after  $\beta$ -amyloid ( $A\beta$ ) injection. A) The percentage of  $A\beta$  accumulation in model group (40  $\times$  magnification) (B) the percentage of apoptosis caused by AD (40  $\times$  magnification).
